# Supplementary material
Source: PubMed Central journal article supplement (PMC6630527)
Supplement: id9b00011_si_001.pdf [file id9b00011_si_001.pdf]

## Supporting Information

### Stable and Conserved G-Quadruplexes in the Long Terminal Repeat Promoter of

#### Retroviruses

Emanuela Ruggiero<sup>†</sup>, Martina Tassinari<sup>†</sup>, Rosalba Perrone<sup>‡</sup>, Matteo Nadai<sup>†</sup> and Sara N. Richter<sup>†,\*</sup>

<sup>†</sup>*Department of Molecular Medicine, University of Padua, via Aristide Gabelli 63, 35121 Padua, Italy*

<sup>‡</sup>*Buck Institute for Research on Aging, 8001 Redwood Boulevard, Novato, California 94945, United States*

#### Content:

|           |          |
|-----------|----------|
| Table S1  | page S2  |
| Table S2  | page S3  |
| Table S3  | page S6  |
| Table S4  | page S8  |
| Figure S1 | page S9  |
| Figure S2 | page S10 |
| Figure S3 | page S11 |
| Figure S4 | page S12 |
| Figure S5 | page S13 |

**Table S1. List of all RVs analyzed in this study, with the corresponding acronyms**

|                    | <b>Virus</b>                                          | <b>Acronym</b> | <b>Virus</b>                          | <b>Acronym</b> |
|--------------------|-------------------------------------------------------|----------------|---------------------------------------|----------------|
| <i>alpha-RVs</i>   | Avian leukosis virus                                  | ALV-A          | Rous sarcoma virus                    | RSV            |
|                    | Avian leukemia virus                                  | ALV-J          | Avian myelocytomatosis virus          | AMV            |
|                    | Y73 sarcoma virus                                     | YAV            | Fujinami sarcoma virus                | FSV            |
|                    | UR2 sarcoma virus                                     | UR2SV          | Avian carcinoma virus                 | ACV            |
| <i>beta-RVs</i>    | Bovine retrovirus CH15                                | BoRV-CH15      | Mason-Pfizer monkey virus             | MPMV           |
|                    | Desmodus rotundus endogenous retrovirus               | DrERV          | Jaagsiekte sheep retrovirus           | JSRV           |
|                    | Ovine enzootic nasal tumor virus                      | ENTV-1         | Mouse mammary tumor virus             | MMTV           |
|                    | Enzootic nasal tumour virus of goats                  | ENTV-2         | Simian retrovirus 4                   | SRV-4          |
|                    | Squirrel monkey retrovirus                            | SMRV           |                                       |                |
| <i>delta-RVs</i>   | Simian T-lymphotropic virus 1                         | STLV-1         | Human T-lymphotropic virus 1          | HTLV-1         |
|                    | Simian T-lymphotropic virus 2                         | STLV-2         | Human T-lymphotropic virus 2          | HTLV-2         |
|                    | Simian T-lymphotropic virus 3                         | STLV-3         | Bovine leukemia virus                 | BLV            |
| <i>gamma-RVs</i>   | Friend murine leukemia virus                          | F-MuLV         | Moloney murine sarcoma virus          | MuSV           |
|                    | Moloney murine leukemia virus                         | Mo-MLV         | Feline leukemia virus                 | FeLV           |
|                    | Baboon endogenous virus                               | BaEV           | Gibbon ape leukemia virus             | GALV           |
|                    | Mus musculus mobilized endogenous polytropic provirus | Mus            | Murine osteosarcoma virus             | MSV            |
|                    | Koala retrovirus                                      | KoRV           | Abelson murine leukemia virus         | A-MuLV         |
|                    | RD114 retrovirus                                      | RD-114         | Spleen focus-forming virus            | SFFV           |
|                    | Woolly monkey sarcoma virus                           | WMSV           | Porcine endogenous retrovirus E       | PERV-E         |
|                    | Reticuloendotheliosis virus                           | REV            |                                       |                |
| <i>epsilon-RVs</i> | Walleye dermal sarcoma virus                          | WDSV           | Walleye epidermal hyperplasia virus 2 | WEHV-2         |
|                    | Walleye epidermal hyperplasia virus 1                 | WEHV-1         |                                       |                |
| <i>spuma-RVs</i>   | Human spumaretrovirus (or human foamy virus)          | HFV            | Feline foamy virus                    | FFV            |
|                    | Simian foamy virus                                    | SFV            | Equine foamy virus                    | EFV            |
|                    | Macaque simian foamy virus                            | M-SFV          | Bovine foamy virus                    | BFV            |
|                    | African green monkey simian foamy virus               | SFV-3          |                                       |                |

**Table S2.** PQS analysis performed with QuadBase2 within the LTR region of RVs. G<sub>3</sub> tracts are reported in red and bold, non-overlapping bulged G<sub>3</sub> tracts (e.g. GGxG) are reported in blue and bold, overlapping bulged G<sub>3</sub> tracts (eg.GXGGG) are underlined.

|                 | Virus            | Sequence                                                                                                                                                                                | Strand                                                                                                                                                                                                               |                  |
|-----------------|------------------|-----------------------------------------------------------------------------------------------------------------------------------------------------------------------------------------|----------------------------------------------------------------------------------------------------------------------------------------------------------------------------------------------------------------------|------------------|
| <i>alfa-RVs</i> | ALV-A            | <i>NF</i> <sup>a</sup>                                                                                                                                                                  |                                                                                                                                                                                                                      |                  |
|                 | ALV-J            | <b>GGTGCACACCAATGTGGTGGGAGGTAAAATGGCG</b>                                                                                                                                               | -                                                                                                                                                                                                                    |                  |
|                 | YAV              | <i>NF</i>                                                                                                                                                                               |                                                                                                                                                                                                                      |                  |
|                 | UR2SV            | <b>GGTGCACACCAATGTGGTGAGTGGTAAAATGGCG</b>                                                                                                                                               | -                                                                                                                                                                                                                    |                  |
|                 | RSV              | <i>NF</i>                                                                                                                                                                               |                                                                                                                                                                                                                      |                  |
|                 | AMV              | <i>NF</i>                                                                                                                                                                               |                                                                                                                                                                                                                      |                  |
|                 | FSV              | <i>NF</i>                                                                                                                                                                               |                                                                                                                                                                                                                      |                  |
|                 | ACV              | <b>GGTGGAAGTAAGGTGGTATGATCGTGGTATGATCGTGG</b>                                                                                                                                           | +                                                                                                                                                                                                                    |                  |
| <i>beta-RVs</i> | BoRV-CH15        | <i>NF</i>                                                                                                                                                                               |                                                                                                                                                                                                                      |                  |
|                 | DrERV            | <b>GGTGAGGCGACTGCATGGGGGAGCTTGAAAGGGCAGCGCTGCACTGCGG</b><br><b>GGGCAGCGCTGCACTGCGGAGGAGGGGTGAGGAGGG</b>                                                                                 | -<br>-                                                                                                                                                                                                               |                  |
|                 | ENTV-1           | <u>GCGGGGACAACCTGCGGAGGGTTAAGTCCTGGGAG</u>                                                                                                                                              | +                                                                                                                                                                                                                    |                  |
|                 | SMRV             | <b>GGCGTGGTGGCGGCCACCAATGGAGGACCTGATCACGGG</b><br><b>GGGTTTCCTTATATAGGGAGGGGAGAGGGTAGAGAGGGG</b><br><b>GTGGATGAGAAAAGGATGGGACAAGAGGCG</b>                                               | +<br>-<br>-                                                                                                                                                                                                          |                  |
|                 | ENTV-2           | <i>NF</i>                                                                                                                                                                               |                                                                                                                                                                                                                      |                  |
|                 | MPMV             | <b>GGAGGAGGGAGTGGGAATTGAAAGG</b>                                                                                                                                                        | -                                                                                                                                                                                                                    |                  |
|                 | JSRV             | <i>NF</i>                                                                                                                                                                               |                                                                                                                                                                                                                      |                  |
|                 | MMTV             | <b>GGGGCTATTGGGGGAAGTTGCGGTTTCGTGCTCGCAGGG</b><br><b>GCGGCTTGTAAGAGGAAGTTGGCTGTGGTCCTTGCCTCAGGAGG</b><br><b>GGAGACAGGTGGTGGCAACCAGGGACTTATAGGGG</b><br><u>GAGGGTCACCGGGGTCTGCGGGGGG</u> | +<br>-<br>+<br>-                                                                                                                                                                                                     |                  |
|                 | SRV-4            | <u>GGCGGGAAGGAAAAGGAAACGTCA</u> <b>GCGGACGCTGGG</b>                                                                                                                                     | -                                                                                                                                                                                                                    |                  |
|                 | <i>delta-RVs</i> | STLV-1                                                                                                                                                                                  | <b>GGGAGGAAATGGGTGGTTCCCGGTGGCTTCCCGGAGG</b><br><b>GGAGTCTATAAAAGCGTGGAGACAGTTCAGGAGGGG</b><br><b>CGGCGTGGATGGCGGCCTCAGGTAGGGCGGC</b> <u>GGGCGCGTAGGAG</u><br><b>GGCGGACGCAGTTCAGGAGGCACCACAGGC</b> <u>GGGAGGCGG</u> | -<br>+<br>-<br>- |
|                 |                  | STLV-2                                                                                                                                                                                  | <b>GGGGAAGTGGGTAAGGGCGAGGTTATTTTTCTGGAG</b><br><b>GGGCCAGTGGTGCAGGGAGGGG</b><br><b>GGGTGTTTTGGGCCTCTCCGGGAGGGG</b>                                                                                                   | -<br>-<br>+      |
|                 |                  | STLV-3                                                                                                                                                                                  | <i>NF</i>                                                                                                                                                                                                            |                  |

|                  |        |                                                                                                                                                                                                                                                                                                                                                                                                                                 |                            |
|------------------|--------|---------------------------------------------------------------------------------------------------------------------------------------------------------------------------------------------------------------------------------------------------------------------------------------------------------------------------------------------------------------------------------------------------------------------------------|----------------------------|
| <b>gamma-RVs</b> | HTLV-1 | <b>GGGAGGAAATGGG</b> <u>TGGT</u> CCCGGTGGCTTCCCGAGG<br><b>GGAG</b> TCTATAAAAGCGT <b>GGGG</b> ACAGTTCAGGAGGGG<br><b>GGCG</b> TGGAT <b>GGCG</b> GCCTCAGGTAAG <b>GGCG</b> <u>GC</u> <b>GGG</b> CGCGTGAAGGAG<br><b>GGCG</b> GACGTAGTTCAGGAGGCACCACAGGC <b>GG</b> AG <b>GGCG</b>                                                                                                                                                     | -<br>+<br>-<br>-           |
|                  | HTLV-2 | <b>GGGGG</b> AGGGACGTCA <b>GGG</b> CCGTGG<br><b>GGG</b> GAAGT <b>GGG</b> TAA <b>GGG</b> TGAGG<br><b>GGCG</b> TCTCAACCGAGGCCGCTT <b>GGAG</b> AGGATGGATCCCCAAGGTG<br><b>GAGG</b> AGACTTACCTT <b>GGG</b> AGGAGCAGTTCAGGAGGTGCCGAGGCCGGG<br><b>GGCG</b> TATGTTGGCCCC <b>GGG</b> ACGCCTGCCAAGA <b>GGG</b> CGGCCGTTGAGG<br><b>GGCG</b> TCCC <b>GGGG</b> CCAACATACGCC <b>GTGG</b> AGCGCAGCAA <b>GGG</b> CTAGGG                         | -<br>-<br>-<br>-<br>-<br>+ |
|                  | BLV    | <b>GGGTGTGG</b> ATTTTT <b>GGG</b> AAAGGGGAAGTT <b>GGGG</b> AGGTAC <b>GGGG</b><br><b>GTGG</b> AGACGGTCA <b>GAGG</b> ACCG <b>GAG</b> ATAGAGCTCGCG <b>GGCG</b>                                                                                                                                                                                                                                                                     | -<br>-                     |
|                  | F-MuLV | <b>GGCG</b> ACTCAGTCTATCG <b>GAG</b> ACT <b>GGCG</b> CGCCGAGTGA <b>GGGG</b>                                                                                                                                                                                                                                                                                                                                                     | -                          |
|                  | Mo-MLV | <b>GGAG</b> ACT <b>GGCG</b> CCCCGAGTGA <b>GGGG</b> TGT <b>GGG</b><br><b>GGCG</b> ACTCAGTCAATCG <b>GAG</b> ACT <b>GGCG</b> CTGCAACTGCAAG <b>AGG</b><br><b>GGGGG</b> TCTTTCATTT <b>GGGGG</b> CTCGTCC <b>GGG</b> ATCGGG<br><b>GGTGGTGGG</b> TC <b>GGT</b> GTCCT <b>GGG</b> CAGGGG<br><b>GGG</b> ACGTCTCCCA <b>GGG</b> TT <b>GGCG</b> CC <b>GGG</b> TG<br><b>GGG</b> AGACGTCCCA <b>GGG</b> ACTTCC <b>GGGGG</b> CCGTTTTT <b>GTGG</b> | -<br>-<br>+<br>-<br>-<br>+ |
|                  | BaEV   | <b>GGGTCTGGG</b> TTGCAG <b>GGG</b> TCGGG<br><b>GGGGTGGG</b> ATAG <b>GTG</b> CTAGCCCC <b>GGGG</b> AGGTCT <b>GGGG</b>                                                                                                                                                                                                                                                                                                             | -<br>-                     |
|                  | Mus    | <b>GGG</b> ACAG <b>GGGG</b> CCAAATATCG <b>GTG</b> GTCAAGCACCT <b>GGG</b><br><b>GGGTATGGG</b> <u>AGGGG</u> TAC <b>GAGG</b> AAA <b>GGG</b><br><b>GGG</b> CT <b>GGGG</b> CT <b>GGGG</b> AGCAAAAAG <b>GGCGG</b>                                                                                                                                                                                                                     | +<br>-<br>-                |
|                  | KoRV   | NF                                                                                                                                                                                                                                                                                                                                                                                                                              |                            |
|                  | RD-114 | <b>GCGG</b> TTA <b>GGG</b> T <b>GGG</b> CGCATAAG <b>GGG</b><br><b>GCGG</b> CT <b>GGGG</b> ACTTTCGGGCTA <b>GGGTGGGG</b> CGCATAAG <b>GGG</b><br><b>GGG</b> TTGCGAAG <b>GGG</b> CTGATGCAACTC <b>GGGG</b> CCCGGG<br><b>GGTGGTTGGGG</b> TTGT <b>GGG</b> TAATTTTCGTCCC <b>GGGG</b> AAGCTT <b>GGG</b>                                                                                                                                  | -<br>-<br>-<br>-           |
|                  | WMSV   | <b>GGCG</b> ACTCAGTCTCTCG <b>GAG</b> ACT <b>GGCG</b> CGCCGAGT <b>GGAG</b>                                                                                                                                                                                                                                                                                                                                                       | -                          |
|                  | REV    | <u>GTGGG</u> <b>AGGG</b> AGCTCC <b>GGGGGGGGG</b>                                                                                                                                                                                                                                                                                                                                                                                | -                          |
|                  | MuSV   | <b>GAGG</b> CTTTATT <b>GGG</b> AATAC <b>GGG</b> TACCC <b>GGGCG</b><br><b>GGGG</b> GTCTTTCATTT <b>GGGG</b> GCTCGTCC <b>GGG</b> ATT <b>GGAG</b><br><b>GGTGGTGGG</b> TC <b>GGT</b> GTCCT <b>GGG</b> CAGGGG                                                                                                                                                                                                                         | -<br>+<br>-                |

|                    |        |                                                                                      |   |
|--------------------|--------|--------------------------------------------------------------------------------------|---|
|                    |        | <b>GGG</b> ACGTCTCCCA <b>GGG</b> TT <b>GCGG</b> CC <b>GGG</b> TG                     | - |
|                    | FeLV   | <b>GTGG</b> TCTC <b>GGT</b> GTTCTGT <b>GGG</b> CG <b>GGGG</b> TCTCATCGCC <b>GAGG</b> | + |
|                    | GALV   | <i>NF</i>                                                                            |   |
|                    | MSV    | <b>GGAG</b> GTAAGAG <b>GAGG</b> CTGGAAAGTACC <b>GGG</b> ACTA <b>GGG</b>              | + |
|                    |        | <b>GGCG</b> ACTCAGTCTATC <b>GGAG</b> GACT <b>GGCG</b> CGCCGAGTGT <b>GGGG</b>         | - |
|                    | A-MuLV | <b>GGAG</b> GACT <b>GGCG</b> CGCCGAGTGA <b>GGGG</b> TTGT <b>GGG</b>                  | - |
|                    | SFFV   | <b>GGCG</b> ACTCAGTCTGT <b>GGAG</b> GACT <b>GGCG</b> CGCCGAGTGA <b>GGGG</b>          | - |
|                    | PERV-E | <i>NF</i>                                                                            |   |
| <i>epsilon-RVs</i> | WDSV   | <i>NF</i>                                                                            |   |
|                    | WEHV-1 | <i>NF</i>                                                                            |   |
|                    | WEHV-2 | <i>NF</i>                                                                            |   |
| <i>spuma-RVs</i>   | HSRV   | <b>GAGG</b> AGCAG <b>GAG</b> TATTT <b>GGG</b> TCAC <b>GAGG</b>                       | - |
|                    | SFV    | <b>GAGG</b> AGCT <b>GGAG</b> TATTT <b>GGG</b> TAGT <b>GAGG</b>                       | - |
|                    | M-SFV  | <i>NF</i>                                                                            |   |
|                    | SFV-3  | <i>NF</i>                                                                            |   |
|                    | FFV    | <i>NF</i>                                                                            |   |
|                    | EFV    | <b>GAGG</b> ATCGTCATCAG <b>GAGG</b> AATCTTCGCCA <b>GGG</b> T <b>GAGG</b>             | - |
|                    | BFV    | <b>GTGG</b> TAAACATAA <b>GGG</b> TCCTCACGACAGT <b>GGAGAGGTG</b>                      | - |
|                    | FFV    | <i>NF</i>                                                                            |   |

<sup>a</sup>*NF*: Not Found.

**Table S3. Sequences used for base conservation analysis of RVs PQS. For each analyzed virus, accession numbers of the different strains are provided, with the reference strains reported in bold.**

|                  | Virus         | Accession number                                                                                                                                                                                       | Virus        | Accession number                                                                                                                                                                                                                                                                                                                                                                                     |
|------------------|---------------|--------------------------------------------------------------------------------------------------------------------------------------------------------------------------------------------------------|--------------|------------------------------------------------------------------------------------------------------------------------------------------------------------------------------------------------------------------------------------------------------------------------------------------------------------------------------------------------------------------------------------------------------|
| <i>beta-RVs</i>  | <b>DrERV</b>  | <b>NC_027117.1</b><br>KP175582.1<br>KP175581.1                                                                                                                                                         | <b>MPMV</b>  | <b>NC_001550.1</b><br>M12349.1<br>AF033815.1<br>M11841.1                                                                                                                                                                                                                                                                                                                                             |
|                  | <b>ENTV-1</b> | <b>NC_007015.1</b><br>GU292318.1<br>GU292317.1<br>GU292316.1<br>GU292315.1<br>GU292314.1<br>FJ744149.1<br>FJ744148.1<br>FJ744147.1<br>FJ744146.1<br>KC189895.1<br>FJ744150.1                           | <b>MMTV</b>  | <b>NC_001503.1</b><br>AF228552.1<br>AF228551.1<br>AF228550.1<br>M15122.1<br>AF033807.1<br>L37517.1                                                                                                                                                                                                                                                                                                   |
|                  | <b>SMRV</b>   | <b>NC_001514</b><br>M23385.1                                                                                                                                                                           | <b>SRV-4</b> | <b>NC_014474.1</b><br>AB920340.1<br>FJ979639.1<br>FJ979638.1<br>FJ971077.1<br>AB920339.1                                                                                                                                                                                                                                                                                                             |
| <i>delta-RVs</i> | <b>STLV-2</b> | <b>NC_001815.1</b><br>U90557.1<br>Y14570.1                                                                                                                                                             | <b>BLV</b>   | LC080652.1<br>LC080651.1<br>LC005616.1<br>LC005615.1<br>AB934283.1<br>AB934282.1<br>HE967303.1<br>HE967301.1<br>HE967302.1<br>AB987702.1<br>AF257515.1<br>FJ914764.1<br>KT122858.1<br>AF033818.1<br>AP018032.1<br>AP018031.1<br>AP018030.1<br>AP018029.1<br>AP018028.1<br>AP018027.1<br>AP018026.1<br>AP018025.1<br>AP018024.1<br>AP018023.1<br>AP018022.1<br>AP018021.1<br>AP018020.1<br>AP018019.1 |
|                  | <b>HTLV-2</b> | <b>NC_001488.1</b><br>AF412314.1<br>M10060.1<br>GU212854.1<br>AF074965.1<br>AF139382.1<br>AF326584.1<br>L11456.1<br>AF326583.1<br>Y14365.1<br>Y13051.1                                                 |              |                                                                                                                                                                                                                                                                                                                                                                                                      |
|                  | <b>BLV</b>    | <b>NC_001414.1</b><br>EF600696.1<br>LC154849.1<br>LC154848.1<br>K02120.1<br>LC080675.1<br>LC080674.1<br>LC080673.1<br>LC080672.1<br>LC080671.1<br>LC080670.1<br>LC080669.1<br>LC080668.1<br>LC080667.1 |              |                                                                                                                                                                                                                                                                                                                                                                                                      |

|                  |             |                                                                                                                                                                                                                                                                                              |               |                                                                                                                                                                                    |
|------------------|-------------|----------------------------------------------------------------------------------------------------------------------------------------------------------------------------------------------------------------------------------------------------------------------------------------------|---------------|------------------------------------------------------------------------------------------------------------------------------------------------------------------------------------|
|                  |             | LC080666.1<br>LC080665.1<br>LC080664.1<br>LC080663.1<br>LC080662.1<br>LC080661.1<br>LC080660.1<br>LC080659.1<br>LC080658.1<br>LC080657.1<br>LC080656.1<br>LC080655.1<br>LC080654.1<br>LC080653.1                                                                                             |               | AP018018.1<br>AP018017.1<br>AP018016.1<br>AP018015.1<br>AP018014.1<br>AP018013.1<br>AP018012.1<br>AP018011.1<br>AP018010.1<br>AP018009.1<br>AP018008.1<br>AP018007.1<br>AP018006.1 |
| <i>gamma-RVs</i> | <b>BaEV</b> | <b>NC_001815.1</b><br>D10032.1<br>AB979448.1<br>X05470.1                                                                                                                                                                                                                                     | <b>RD-114</b> | <b>NC_009889.1</b><br>AB705393.1<br>AB559882.1<br>EU030001.1<br>AB705392.1                                                                                                         |
|                  | <b>Mus</b>  | <b>NC_029853.1</b><br>FJ544577.2<br>FJ544578.2<br>FJ544576.1                                                                                                                                                                                                                                 | <b>MuSV</b>   | <b>NC_001488.1</b><br>J02266.1<br>AF033813.1                                                                                                                                       |
|                  | <b>REV</b>  | <b>NC_006934.1</b><br>DQ387450.1<br>DQ003591.1<br>AY842951.1<br>KJ909531.1<br>KJ909530.1<br>KJ756349.1<br>KF709431.1<br>JX912710.1<br>GQ415646.2<br>FJ439120.1<br>FJ439119.1<br>KU204703.1<br>KU204702.1<br>GQ375848.1<br>JQ804915.1<br>KX278301.1<br>KU641115.1<br>KF305089.1<br>FJ496333.1 | <b>MoMLV</b>  | <b>NC_001501.1</b><br>AF462057.1<br>AF033811.1<br>M63653.1                                                                                                                         |

**Table S4. Oligonucleotides used in the Taq polymerase stop assay**

|                   | <b>Sequence</b>                                                |
|-------------------|----------------------------------------------------------------|
| <b>RV1</b>        | GGGCAGCGCTGCACTGCGGAGGAGGGGTGAGGAGGGCTGCATATAAGCAGCTGCTTTTTGCC |
| <b>RV5</b>        | GGAGGAGGGAGTGGGAATTGAAGGGCTGCATATAAGCAGCTGCTTTTTGCC            |
| <b>RV7</b>        | GAGGGTCACCGGGGTCTGCGGGGGGCTGCATATAAGCAGCTGCTTTTTGCC            |
| <b>RV9</b>        | GGGCCAGTGGTGCAGGGAGGGGCTGCATATAAGCAGCTGCTTTTTGCC               |
| <b>RV12</b>       | GGGGAAGTGGGTAAGGGTGAGGCTGCATATAAGCAGCTGCTTTTTGCC               |
| <b>RV18</b>       | GGGTCTGGGTTGCAGCGGTCGGGCTGCATATAAGCAGCTGCTTTTTGCC              |
| <b>RV22</b>       | GGGCTGGGGCTGGGGAGCAAAAAGCGGGCTGCATATAAGCAGCTGCTTTTTGCC         |
| <b>RV26</b>       | GTGGGAGGGAGCTCCGGGGGGGGCTGCATATAAGCAGCTGCTTTTTGCC              |
| <b>non-G4 cnt</b> | TTGTCGTAAAGTCTGACTGCGAGCTCTCAGATCCTGCATATAAGCAGCTGCTTTTTGCC    |
| <b>Primer</b>     | GGCAAAAAGCAGCTGCTTATATGCAG                                     |



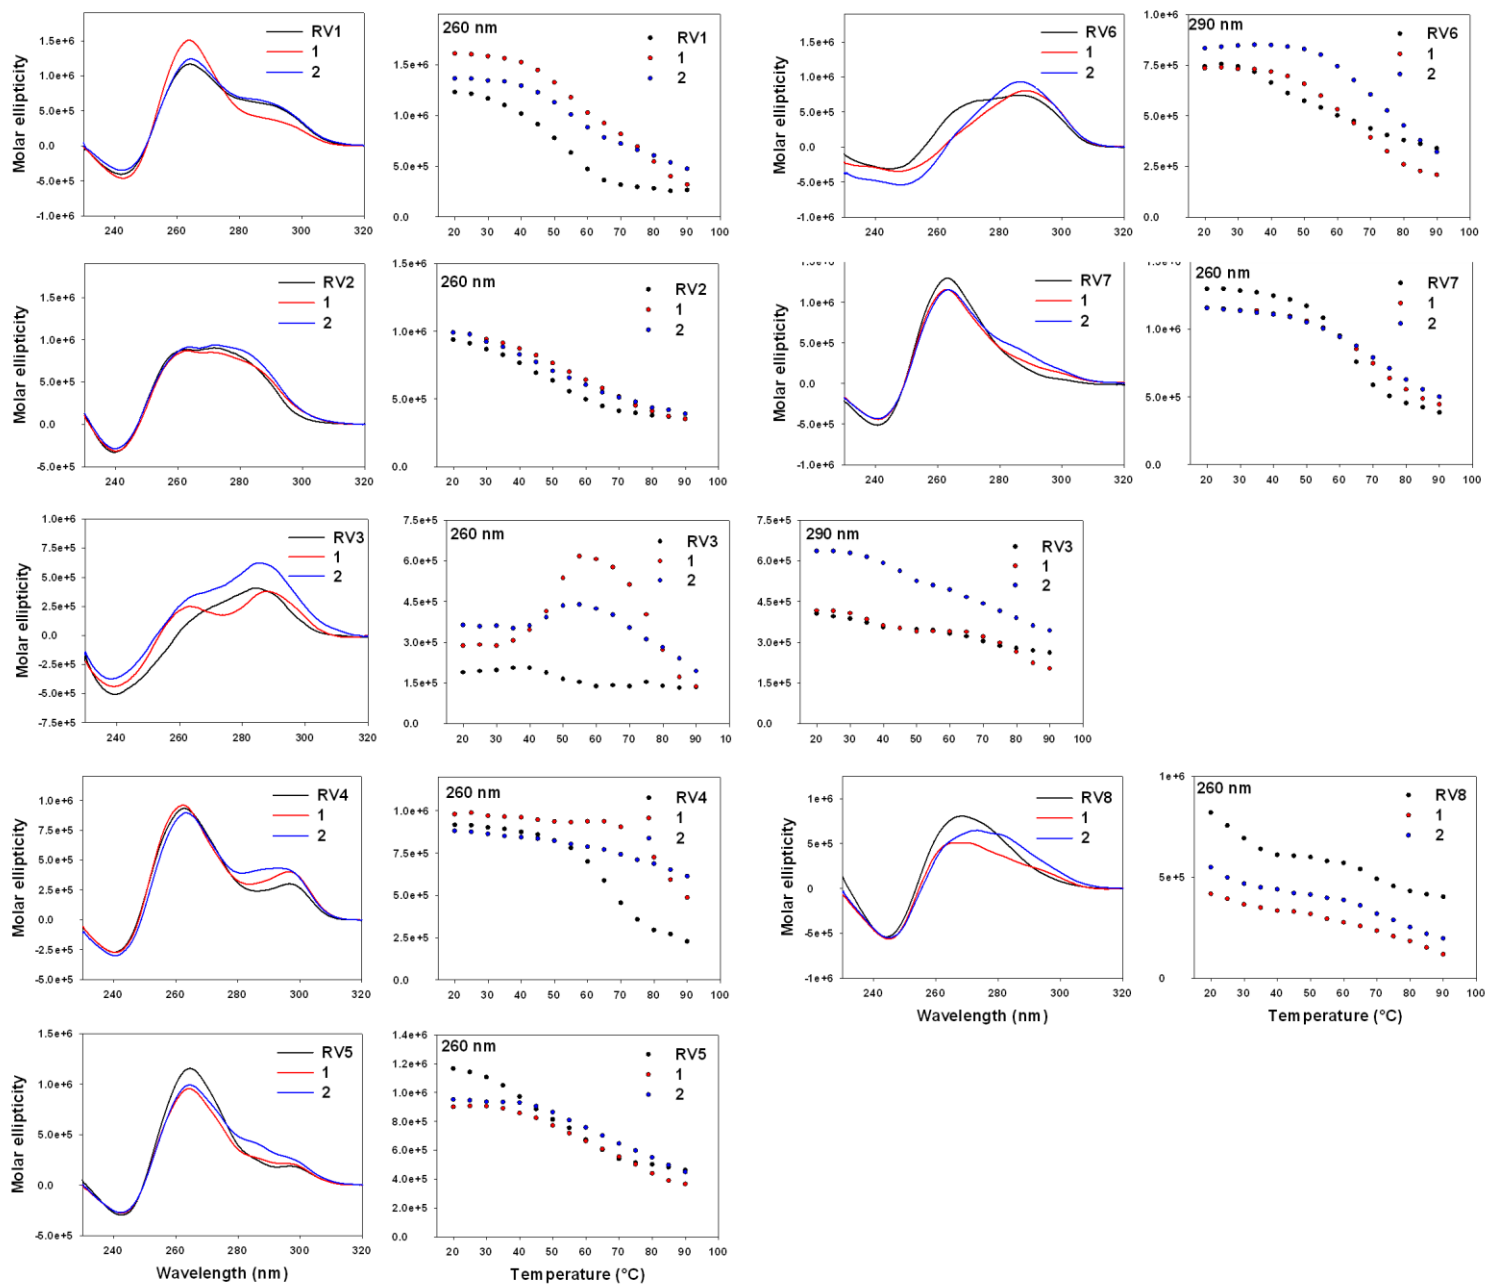

Figure S1. CD spectra of beta-RV G4 sequences in the absence or presence of G4 ligands **1** and **2**, and plots of molar ellipticity vs temperature, measured at the indicated wavelengths.

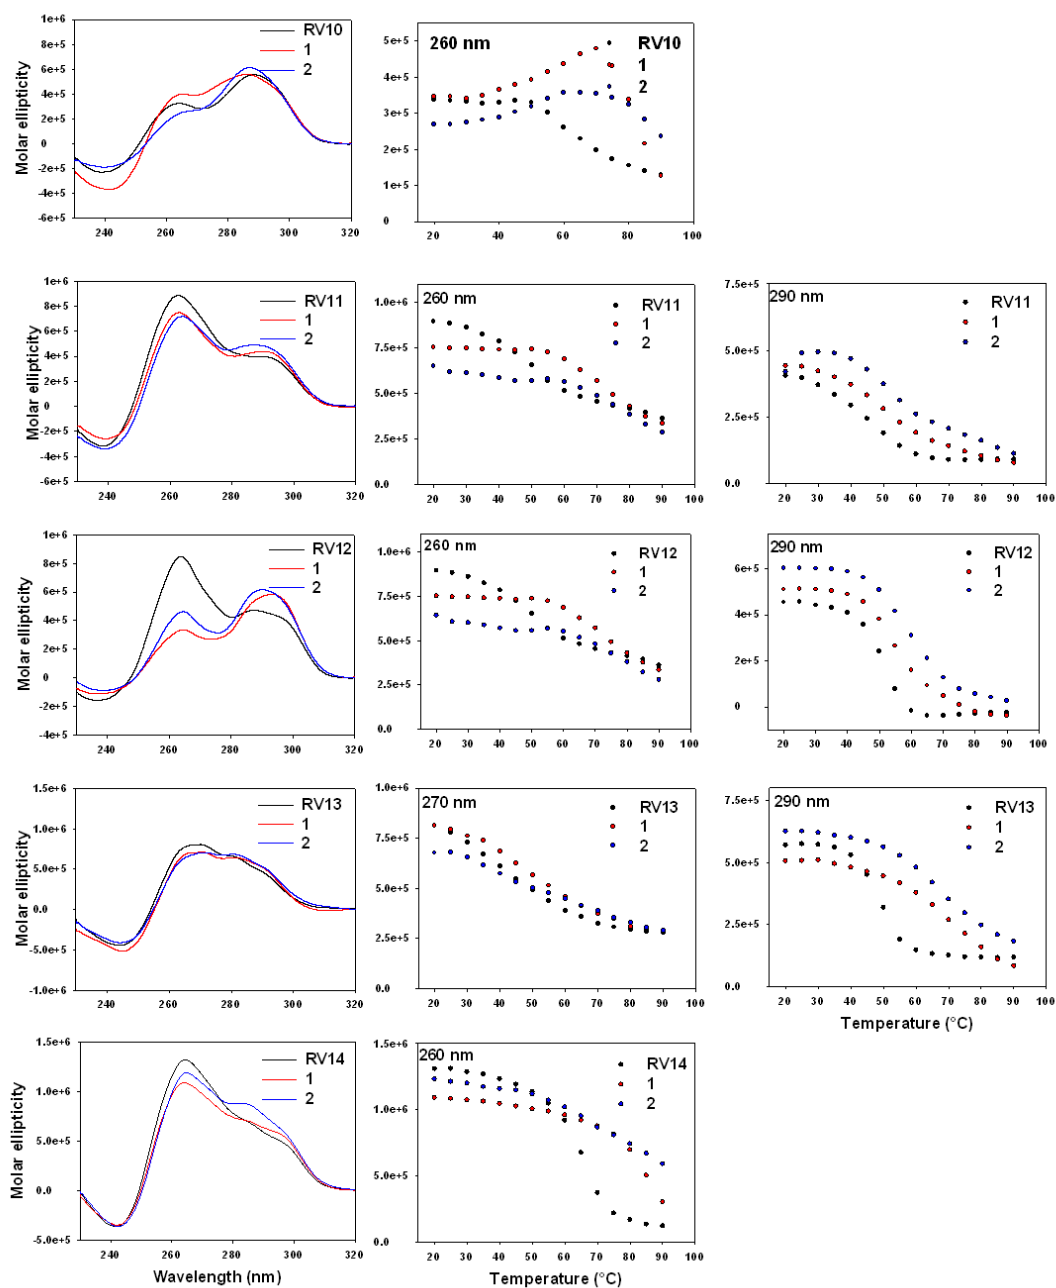

Figure S2. CD spectra of delta-RV G4 sequences in the absence or presence of G4 ligands **1** and **2**, and plots of molar ellipticity vs temperature, measured at the indicated wavelength.

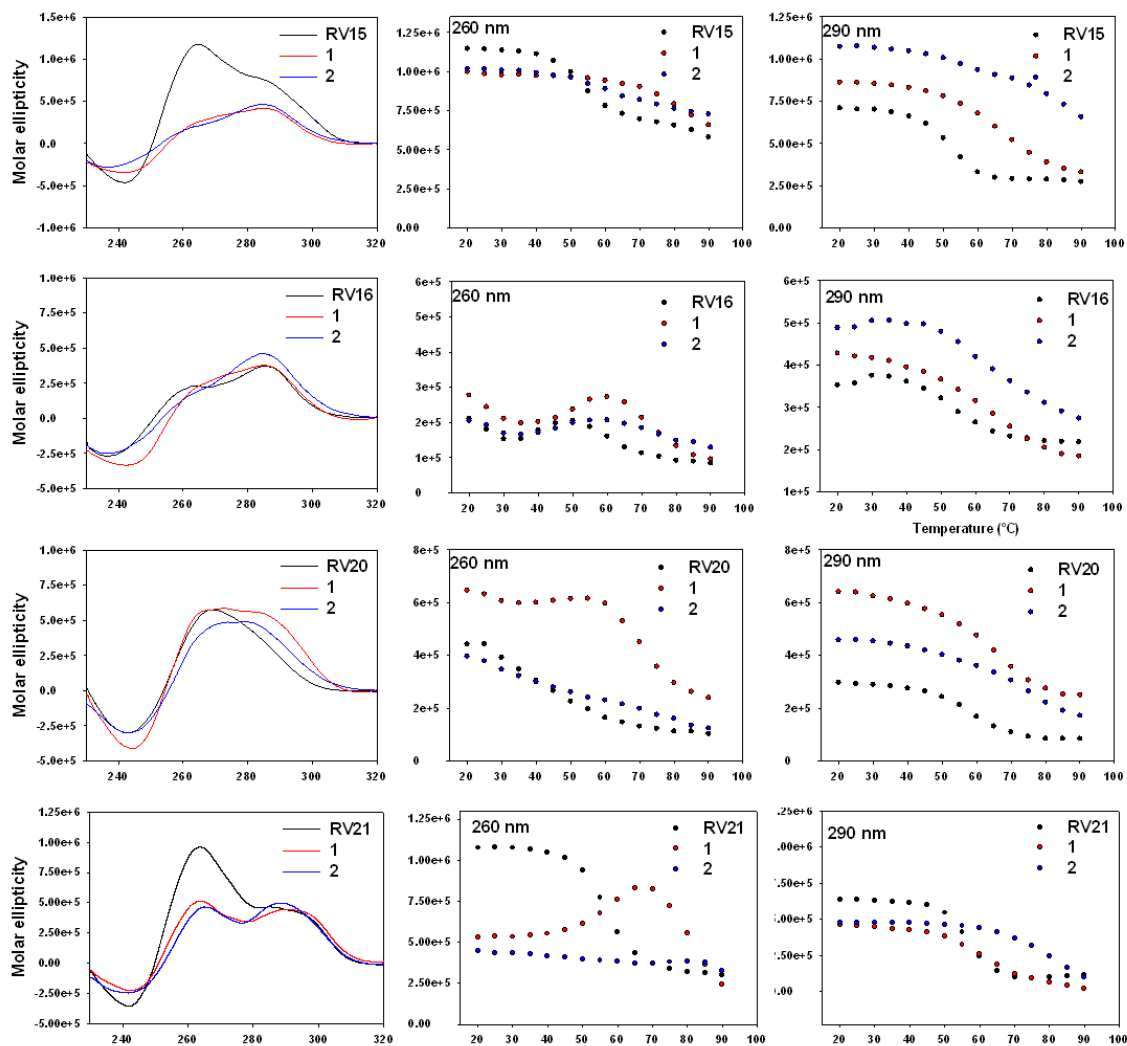

Figure S3A. CD spectra of gamma-RV G4 sequences with two transitions, performed in the absence or presence of G4 ligands **1** and **2**, and plots of molar ellipticity vs temperature, measured at the indicated wavelength.

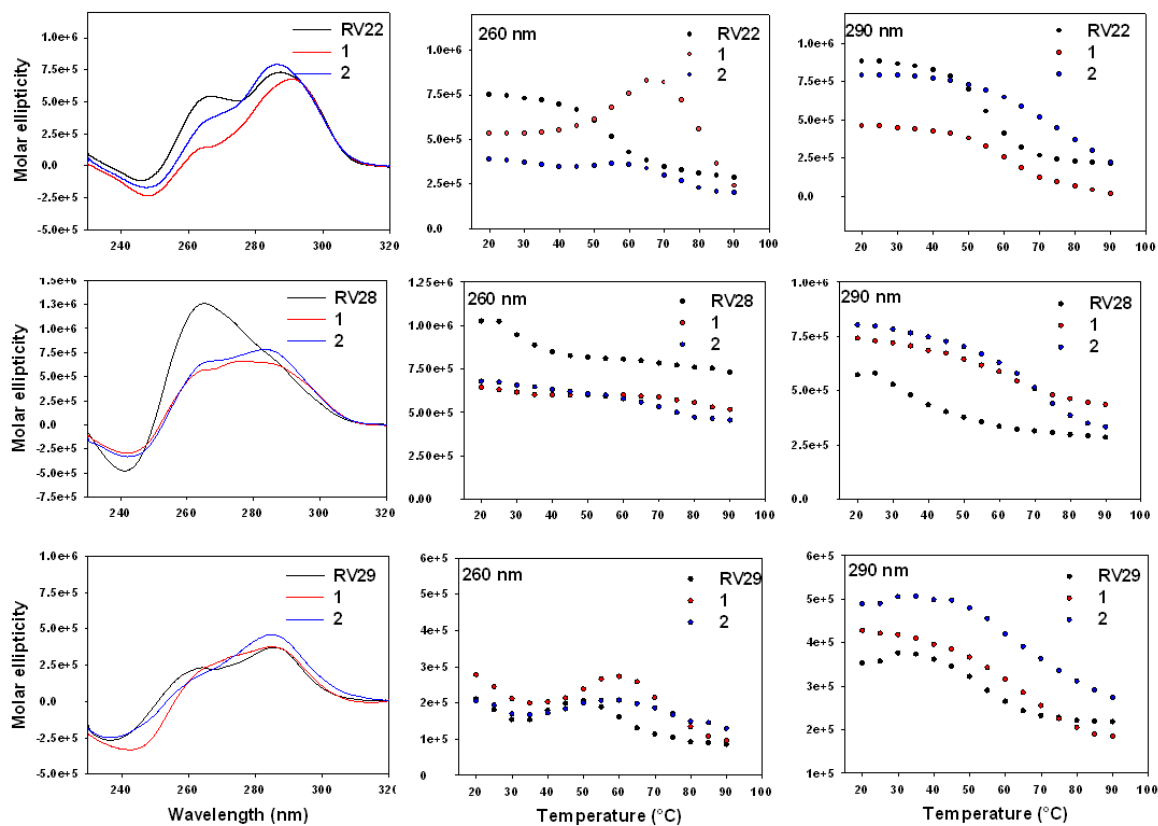

Figure S3B. CD spectra of gamma-RV G4 sequences with two transitions, performed in the absence or presence of G4 ligands **1** and **2**, and plots of molar ellipticity vs temperature, measured at the indicated wavelength.

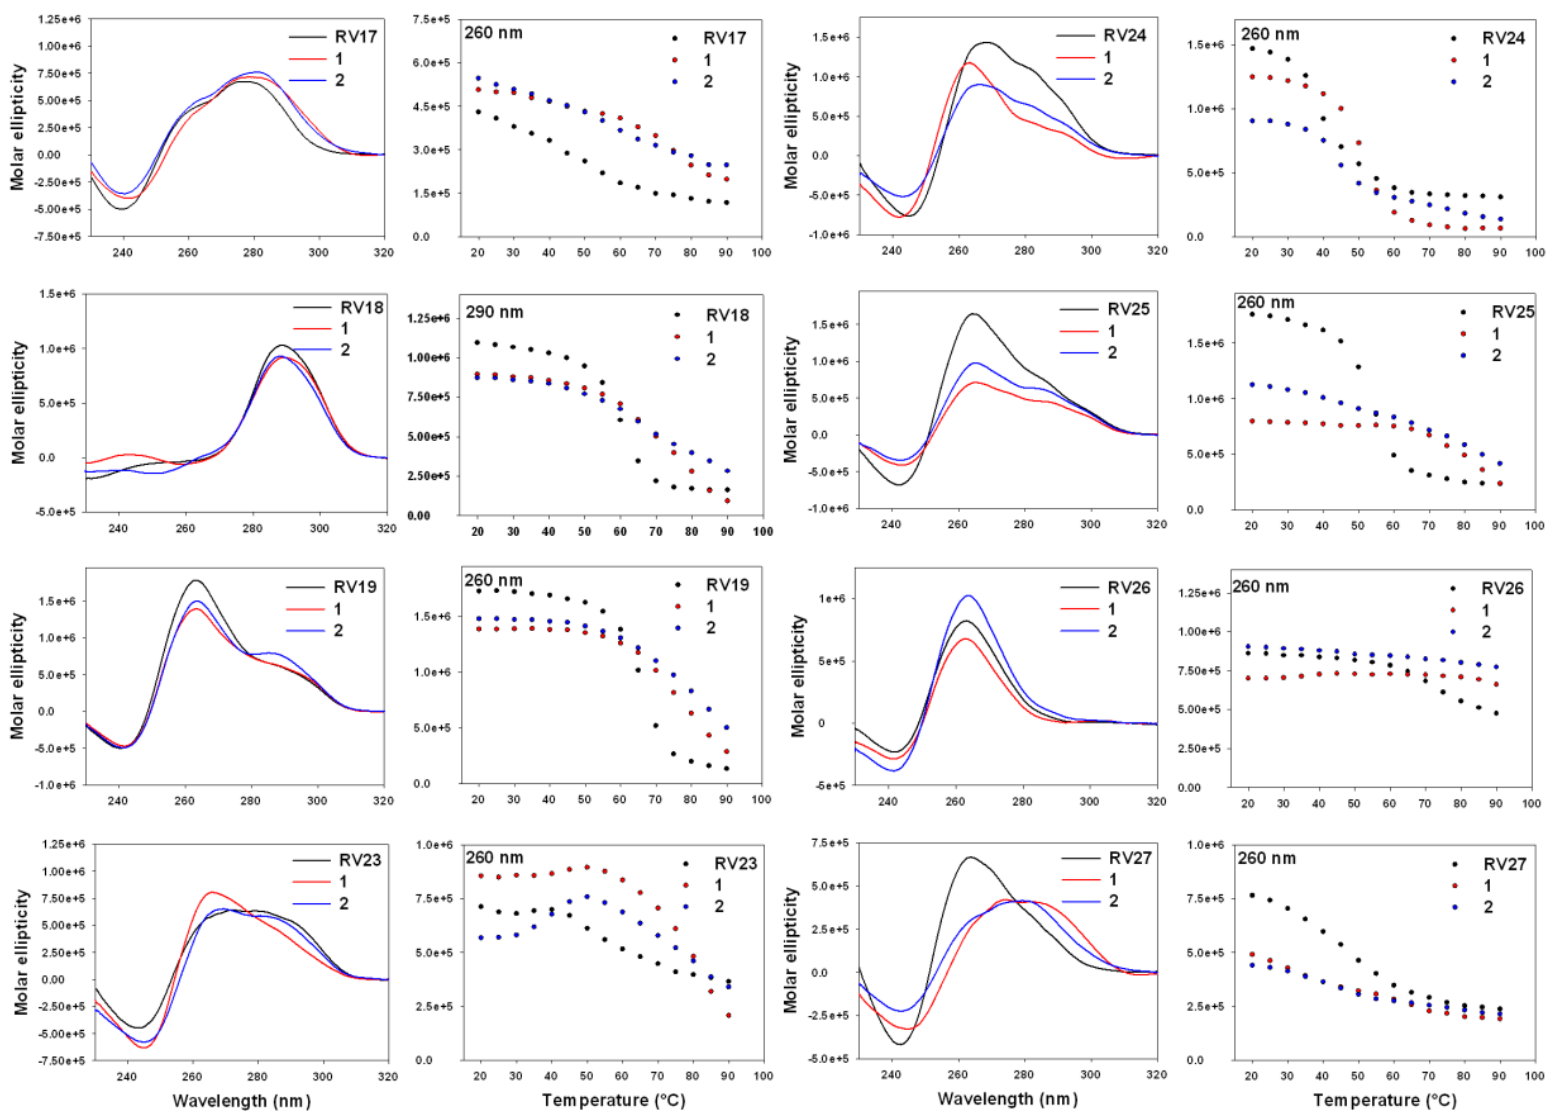

Figure S4. CD spectra of gamma-RV G4 sequences with single transition, performed in the absence or presence of G4 ligands 1 and 2, and plots of molar ellipticity vs temperature, measured at the indicated wavelength.

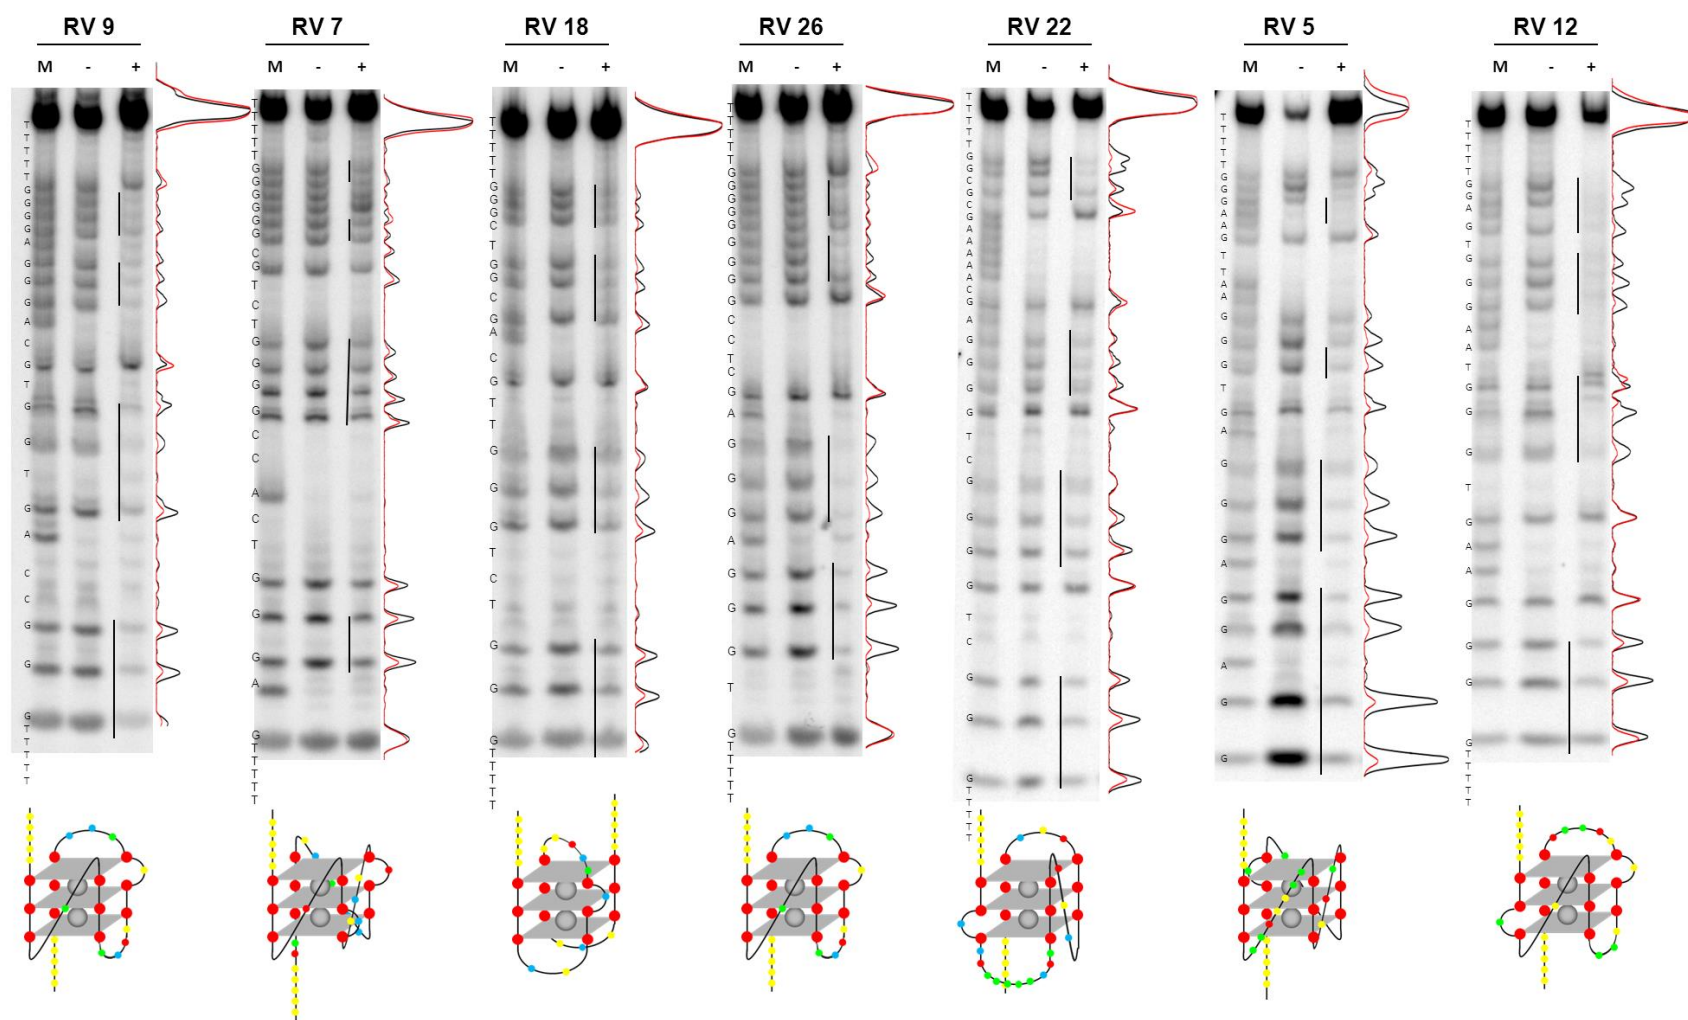

Figure S5. DMS protection analysis of RV G4s folded in the absence (-) or presence (+) of KCl. M is a marker lane obtained with the Maxam and Gilbert sequencing protocol. Proposed G4 structure is shown below the gel image. G, T, C, and A bases are shown in red, yellow, blue, and green, respectively. The densitograms show quantification of cleaved bands intensity in the absence (black lines) and presence (red lines) of KCl.
